# Supplementary material
Source: PubMed Central journal article supplement (PMC4408738)
Supplement: jn.114.206607_nutrition206607SupplementaryData1.pdf [file jn.114.206607_nutrition206607SupplementaryData1.pdf]

## Online Supporting Material

**Supplemental Table 1.** Composition of experimental diets<sup>1</sup>

| Ingredient           | CO     | FO       | POP FO <sup>2</sup> |
|----------------------|--------|----------|---------------------|
|                      |        | <i>g</i> |                     |
| Cornstarch           | 334.0  | 334.0    | 334.0               |
| Dextrose             | 110.0  | 110.0    | 110.0               |
| Casein               | 200.0  | 200.0    | 200.0               |
| Sucrose              | 100.0  | 100.0    | 100.0               |
| Cellulose            | 50.0   | 50.0     | 50.0                |
| Corn Oil             | 150.0  | 35.0     | 35.0                |
| Fish Oil             | 0.0    | 115.0    | 115.0               |
| Cholesterol          | 10.0   | 10.0     | 10.0                |
| Salt mix, AIN-93G    | 30.5   | 30.5     | 30.5                |
| Vitamin mix, AIN-93G | 10.0   | 10.0     | 10.0                |
| L-Cystine            | 3.0    | 3.0      | 3.0                 |
| Choline bitartrate   | 2.5    | 2.5      | 2.5                 |
| TBHQ                 | 0.014  | 0.014    | 0.014               |
| Total                | 1000.0 | 1000.0   | 1000.0              |

<sup>1</sup>CO: control, FO: fish oil, POP FO: persistent organic pollutants contaminated fish oil.

<sup>2</sup>Fish oil was spiked with PCBs (PCB28, PCB52, PCB101, PCB118, PCB138, PCB153, and PCB180), DDT (*p,p'*-DDE, *p,p'*-DDD, and *p,p'*-DDT), and chlordane ( $\gamma$ -Chlordane, *trans*-Nonachlor, and *cis*-Nonachlor). Additional information can be found in the section of “Materials and Methods”.
