# Supplementary material
Source: PubMed Central journal article supplement (PMC4408738)
Supplement: jn.114.206607_nutrition206607SupplementaryData2.pdf [file jn.114.206607_nutrition206607SupplementaryData2.pdf]

## Online Supporting Material

**Supplemental Table 2.** Levels of PCBs and OCs in 4 brands of fish oil<sup>1</sup>

|                         | Fish oil A | Fish oil B | Fish oil C | Fish oil D |
|-------------------------|------------|------------|------------|------------|
| Sample amount, g        | 0.5132     | 0.5055     | 0.5048     | 0.5086     |
| PCB 18, ng              | <0.04      | <0.04      | <0.04      | <0.04      |
| PCB 28, ng              | <0.02      | <0.02      | <0.02      | <0.02      |
| PCB 52, ng              | 0.58       | 0.45       | <0.04      | <0.04      |
| PCB 44, ng              | <0.10      | <0.10      | <0.10      | <0.10      |
| PCB 66, ng              | 0.72       | <0.10      | <0.10      | <0.10      |
| PCB 101, ng             | 3.7        | 0.55       | <0.04      | <0.04      |
| PCB 81, ng              | <0.04      | <0.04      | <0.04      | <0.04      |
| PCB 77, ng              | <0.04      | <0.04      | <0.04      | <0.04      |
| PCB 123, ng             | 1.2        | <0.10      | <0.10      | <0.10      |
| PCB 118, ng             | 4.9        | 1.4        | 0.18       | 0.28       |
| PCB 114, ng             | 0.20       | <0.04      | <0.04      | <0.04      |
| PCB 153, ng             | 22         | 3.6        | 0.62       | 0.72       |
| PCB 105, ng             | 1.2        | 0.51       | <0.04      | <0.04      |
| PCB 138, ng             | 12         | 3.2        | 0.39       | 0.76       |
| PCB 126, ng             | <0.10      | <0.10      | <0.10      | <0.10      |
| PCB 187, ng             | 12         | 0.97       | 0.36       | 0.55       |
| PCB 128, ng             | 2.9        | 0.76       | <0.10      | <0.10      |
| PCB 167, ng             | 0.59       | 0.24       | <0.10      | <0.10      |
| PCB 156, ng)            | 0.85       | 0.41       | <0.10      | <0.10      |
| PCB 180, ng             | 11         | 2.2        | 0.47       | 0.94       |
| PCB 169, ng             | <0.10      | <0.10      | <0.10      | <0.10      |
| PCB 170, ng             | 5.2        | 1.1        | 0.27       | 0.52       |
| PCB 189, ng             | 0.22       | <0.10      | <0.10      | <0.10      |
| PCB 195, ng             | 1.2        | <0.10      | <0.10      | <0.10      |
| PCB 206, ng             | 14         | <0.10      | <0.10      | <0.10      |
| PCB 209, ng)            | 13         | 0.90       | 0.67       | 0.77       |
| $\alpha$ -Chlordane, ng | 2.0        | 0.41       | <0.10      | <0.10      |
| $\gamma$ -Chlordane, ng | 2.0        | 0.65       | <0.10      | <0.10      |
| trans-Nonachlor, ng     | 1.5        | 0.82       | <0.10      | <0.10      |
| cis-Nonachlor, ng       | 2.1        | 1.1        | <0.10      | 0.25       |
| <i>p,p'</i> -DDE, ng    | 13         | 2.9        | 1.6        | 0.72       |
| <i>p,p'</i> -DDD, ng    | 10         | 2.4        | 1.3        | 1.0        |
| <i>p,p'</i> -DDT, ng    | 1.0        | 1.8        | <0.20      | 0.61       |
| $\alpha$ -BHC, ng       | <0.20      | <0.20      | <0.20      | <0.20      |
| $\beta$ -BHC, ng        | <0.20      | <0.20      | <0.20      | <0.20      |
| $\gamma$ - BHC, ng      | <0.20      | <0.20      | <0.20      | <0.20      |

## Online Supporting Material

**Supplemental Table 2.** Levels of PCBs and OCs in 4 brands of fish oil<sup>1</sup> (continued)

|                                       |       |       |       |       |
|---------------------------------------|-------|-------|-------|-------|
| $\delta$ -BHC, <i>ng</i>              | <0.20 | <0.20 | <0.20 | <0.20 |
| Heptachlor, <i>ng</i>                 | <0.20 | <0.20 | <0.20 | <0.20 |
| Aldrin, <i>ng</i>                     | <0.20 | <0.20 | <0.20 | <0.20 |
| heptachlor epoxid, <i>ng</i>          | <0.20 | <0.20 | <0.20 | <0.20 |
| Endosulfan, <i>ng</i>                 | <1.0  | <1.0  | <1.0  | <1.0  |
| Dieldrin, <i>ng</i>                   | <1.0  | <1.0  | <1.0  | <1.0  |
| Endosulfan II, <i>ng</i>              | <1.0  | <1.0  | <1.0  | <1.0  |
| Endosulfan sulfate, <i>ng</i>         | <1.0  | <1.0  | <1.0  | <1.0  |
| Methoxychlor, <i>ng</i>               | <4.0  | <4.0  | <4.0  | <4.0  |
| Total PCB, <i>ng</i>                  | 110   | 16    | 3.0   | 4.6   |
| Seven PCBs <sup>2</sup> , <i>ng</i>   | 54    | 11    | 1.7   | 2.7   |
| DDTs, <i>ng</i>                       | 25    | 7.1   | 2.8   | 2.4   |
| Chlordanes, <i>ng</i>                 | 7.5   | 3.0   | <0.01 | 0.25  |
|                                       |       |       |       |       |
| Total PCB, <i>ng/g</i>                | 210   | 32    | 5.9   | 9.0   |
| Seven PCBs <sup>2</sup> , <i>ng/g</i> | 110   | 23    | 3.3   | 5.3   |
| DDTs, <i>ng/g</i>                     | 49    | 14    | 5.6   | 4.6   |
| Chlordanes, <i>ng/g</i>               | 14.7  | 5.9   | <0.01 | 0.49  |

<sup>1</sup>Four brands of fish oil were analyzed to quantify the levels of PCBs and OCs and to select a fish oil for the study. Fish oil C had the lowest concentrations of PCBs and OCs, and was selected as the unmodified fish oil. BHC: hexachloro-cyclohexane, DDD: dichlorodiphenyldichloroethane, DDE: dichlorodiphenyldichloroethylene, DDT: dichlorodiphenyltrichloroethane, OC: organochlorine pesticide, PCB: polychlorinated biphenyl.

<sup>2</sup>Seven PCBs include PCB28, PCB52, PCB101, PCB118, PCB138, PCB153, and PCB180.
