# Supplementary material
Source: PubMed Central journal article supplement (PMC4408738)
Supplement: jn.114.206607_nutrition206607SupplementaryData3.pdf [file jn.114.206607_nutrition206607SupplementaryData3.pdf]

### Online Supporting Material

**Supplemental Table 3.** Estimated concentrations of the PCBs and OCs in the contaminated fish oil prepared for this study<sup>1</sup>

|                     | Concentration in fish oil for contaminated fish oil group<br><i>μg/g</i> |
|---------------------|--------------------------------------------------------------------------|
| PCB28               | 0.095                                                                    |
| PCB52               | 0.167                                                                    |
| PCB101              | 0.381                                                                    |
| PCB118              | 0.313                                                                    |
| PCB138              | 0.518                                                                    |
| PCB153              | 0.749                                                                    |
| PCB180              | 0.193                                                                    |
| <i>p,p'</i> -DDE    | 1.11                                                                     |
| <i>p,p'</i> -DDD    | 0.303                                                                    |
| <i>p,p'</i> -DDT    | 0.482                                                                    |
| $\gamma$ -Chlordane | 0.460                                                                    |
| trans-Nonachlor     | 0.861                                                                    |
| cis-Nonachlor       | 0.587                                                                    |

<sup>1</sup>DDD: dichlorodipenyldichloroethane, DDE: dichlorodipenyldichloroethylene, DDT: dichlorodipenyltrichloroethane, OC: organochlorine pesticide, PCB: polychlorinated biphenyl.
