# Supplementary material
Source: PubMed Central journal article supplement (PMC4408738)
Supplement: jn.114.206607_nutrition206607SupplementaryData4.pdf [file jn.114.206607_nutrition206607SupplementaryData4.pdf]

## Online Supporting Material

**Supplemental Table 4.** Body weights and 48 hour food and water intakes in male rats fed CO, FO, or POP FO diet for 9 wk<sup>1</sup>

|                               | CO          | FO          | POP FO      |
|-------------------------------|-------------|-------------|-------------|
|                               |             | <i>g</i>    |             |
| Initial body weight, <i>g</i> | 143 ± 2.90  | 143 ± 2.89  | 143 ± 2.72  |
| Final body weight, <i>g</i>   | 375 ± 3.85  | 381 ± 5.84  | 374 ± 9.42  |
| Weight gain, <i>g/9 wk</i>    | 232 ± 3.20  | 239 ± 5.46  | 231 ± 8.17  |
| 48 h food intake, <i>g</i>    | 36.4 ± 1.07 | 35.0 ± 1.21 | 33.6 ± 1.22 |
| 48 h water intake, <i>g</i>   | 42.5 ± 2.55 | 43.0 ± 3.61 | 39.0 ± 2.16 |
| FER, <i>g/g</i>               | 0.25 ± 0.01 | 0.26 ± 0.01 | 0.26 ± 0.01 |

<sup>1</sup>Data are presented as mean ± SE, *n* = 10 per group. CO: control, FER: Food efficiency ratio (g body weight gain per g food intake), FO: fish oil, POP FO: persistent organic pollutants contaminated fish oil.
